# Supplementary material
Source: Springer Nature journal article supplement (https://www.springermedizin.de/resource/supplementary/12957_2012_1126_MOESM3_ESM.pdf/9561836)

Case 3

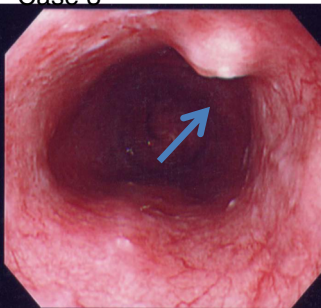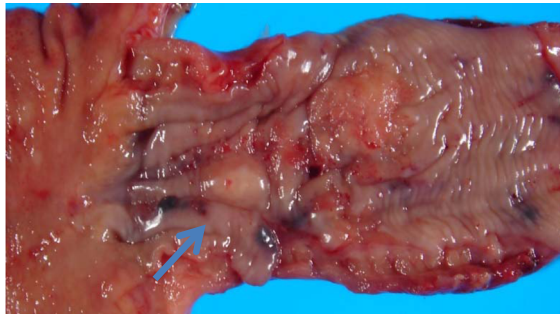

Case 4

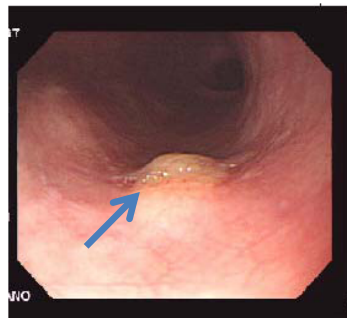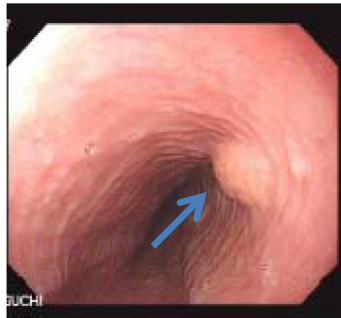

Supplement: MOESM3 [file 9561836]
